# Supplementary material for: Quantitative Assessment of Intervertebral Disc Composition by MRI: Sensitivity to Diurnal Variation
Source: Tomography. 2023 May 16;9(3):1029–40. doi: 10.3390/tomography9030084 (PMC10204382; doi:10.3390/tomography9030084)
Supplement: Supplementary file 1 [file tomography-09-00084-s001.zip › tomography-2384149-supplementary.pdf]

## Supplementary Material

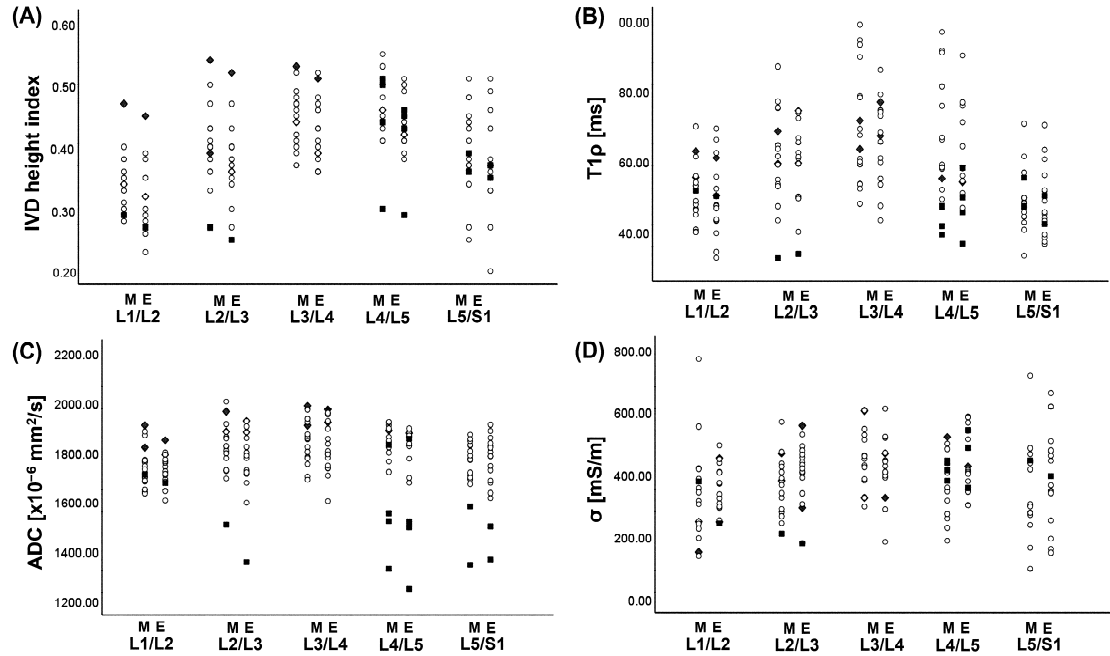

**Figure S1.** Intervertebral disc (IVD) height index (A), T1rho (T1 $\rho$ ) (B), apparent diffusion coefficient (ADC) (C), and electrical conductivity ( $\sigma$ ) (D) values of lumbar intervertebral discs (IVDs) at each time point and Pfirrmann Grade.  $\blacklozenge$ ,  $\bigcirc$ , and  $\blacksquare$  indicate Grade II, Grade III, and Grade IV, respectively. L1/2 refers to the IVD between the first and second lumbar vertebrae, L2/3 that between the second and third vertebrae, and so on. L5/S1 refers to the IVD between the fifth lumbar vertebra and sacrum. M and E refer to morning and evening scans, respectively.
